# Supplementary material for: PGC-1α controls mitochondrial biogenesis and dynamics in lead-induced neurotoxicity
Source: PubMed Central journal article supplement (PMC4600622; doi:10.18632/aging.100790), 2015-09-04
Supplement: aging-07-629-s001.pdf [file aging-07-629-s001.pdf]

**SUPPLEMENTARY MATERIAL**

**Supplementary Material Table1.**

| <b>Target</b>            | <b>Primer sequence</b>                                         |
|--------------------------|----------------------------------------------------------------|
| Promoter DRP1 F          | CAGATTCACGGACCCAGCTT                                           |
| Promoter DRP1 R          | CAAAGGCTGTCGGGAGATGT                                           |
| Promoter PGC1 $\alpha$ F | GGACCTTTGCTGTTTGCCTG                                           |
| Promoter PGC1 $\alpha$ R | GCCACCAACTCTAAACCGGA                                           |
| Promoter SOD2 F          | CCTGGCCTTCTAATCCCGAC                                           |
| Promoter SOD2 R          | CCCTGAGGTTAGGGTTGCTG                                           |
| MFN1 F                   | CCATCACTGCGATCTTCGGCCA                                         |
| MFN1 R                   | CAGCGAGCTTGTTTCTGTAGCCCT                                       |
| MFN2 F                   | CTCTGTGCTGGTTGACGAGT                                           |
| MFN2 R                   | AGCGGTCAGACATGTTTCGT                                           |
| FIS1 F                   | GTAGGGTTACATGGATGCCCAGAGA                                      |
| FIS1 R                   | GGCAACAGCTCCTCCAGCAG                                           |
| DRP1 F                   | GGTGAATTGGAGATGGTGGTCGA                                        |
| DRP1 R                   | TTCGTGCAACTGGAAGTGGCACA                                        |
| PGC1 $\alpha$ F          | ACTGAGCTACCCTTGGGATG                                           |
| PGC1 $\alpha$ R          | TAAGGATTCGGTGGTGACA                                            |
| TFAM F                   | GTCGCGTGGGACAAACCGGA                                           |
| TFAM R                   | CACATCTCGACCCCGTGCG                                            |
| GAPDH F                  | GGGGCTCTCTGCTCCTCCCTG                                          |
| GAPDH R                  | CGGCCAAATCCGTTACACCG                                           |
| CaNB F                   | TCCAACCGAGACTCCGCCCG                                           |
| CaNB R                   | GACGGCGGCTTTGCTGTCCG                                           |
| NRF1 F                   | TTACT TGCTGTGGCTGATGG                                          |
| NRF1 R                   | CCTCTGATGCTTGCGTCGTCT                                          |
| NRF2 F                   | CAGAGCAAGTGACGAGATGG                                           |
| NRF2 R                   | CCGAAATGTTGAGTGTGGTG                                           |
| Scramble shRNA F         | CCGGCCTAAGGTTAAGTCGCCCTCGCTCT<br>AGCGAGGGCGACTTAACCTTAGGTTTTTG |
| Scramble shRNA R         | AATTCAAAAACCTAAGGTTAAGTCGCCCT<br>CGCTCTAGCGAGGGCGACTTAACCTTAGG |
| shRNABAP31 F             | CCGGGACGCCTGGTGACTCTCATTTCTCG<br>AGAAATGAGAGTCACCAGGCGTCTTTTTG |
| shRNA BAP31 R            | AATTCAAAAAGACGCCTGGTGACTCTCAT<br>TTCTCGAGAAATGAGAGTCACCAGGCGTC |
| shRNAPGC1 $\alpha$ F     | CCCTGCCATTGTTAAGAGACC                                          |
| shRNAPGC1 $\alpha$ R     | TGCTGCTGTTTCTGTTTC                                             |

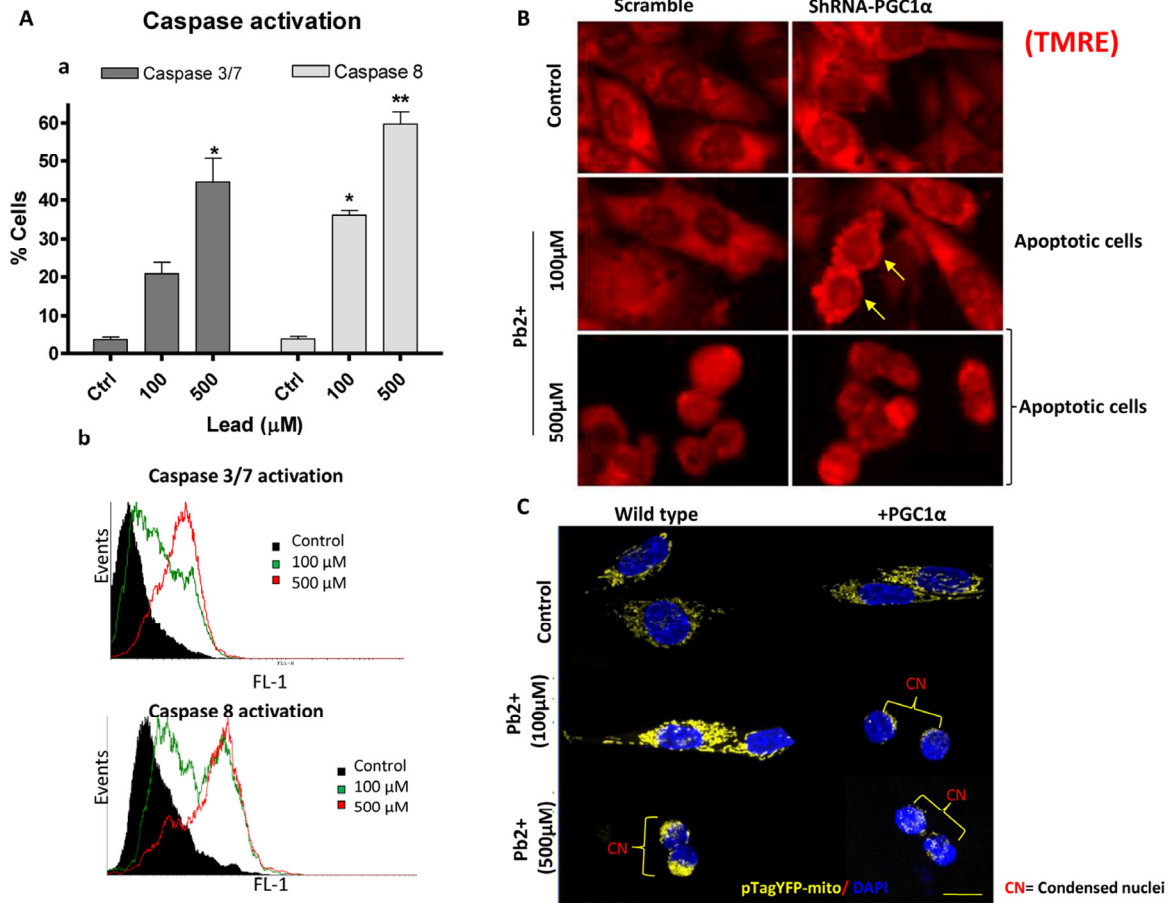

**Supplementary Figure 1-S1. Assessment of apoptotic cell death induced by lead.**(A-a) FCAS analysis of caspases3/7 and caspase 8 activation in N27 cells exposed to 100μM and 500μM lead. (A-b) Representative FACS histogram of caspases3/7 and caspase 8 activation. (B) Confocal microscopy analysis of morphological features of apoptotic cells in both scramble and shRNA-PGC1α N27 cells. Cells were exposed to 100μM and 500μM lead, pre-stained with TMRE and immunohistochemistry assay was performed. (C) Wild type and overexpressed PGC1α cells were transfected with pTagYFP-mito and the cells were treated with lead (100μM and 500μM) followed by immunohistochemistry assay. Cell nucleus was stained with DAPI. CN (Condensed nuclei). \* $P < 0.05$ , \*\* $P < 0.01$ ,  $n = 3$ ; mean  $\pm$  SE.

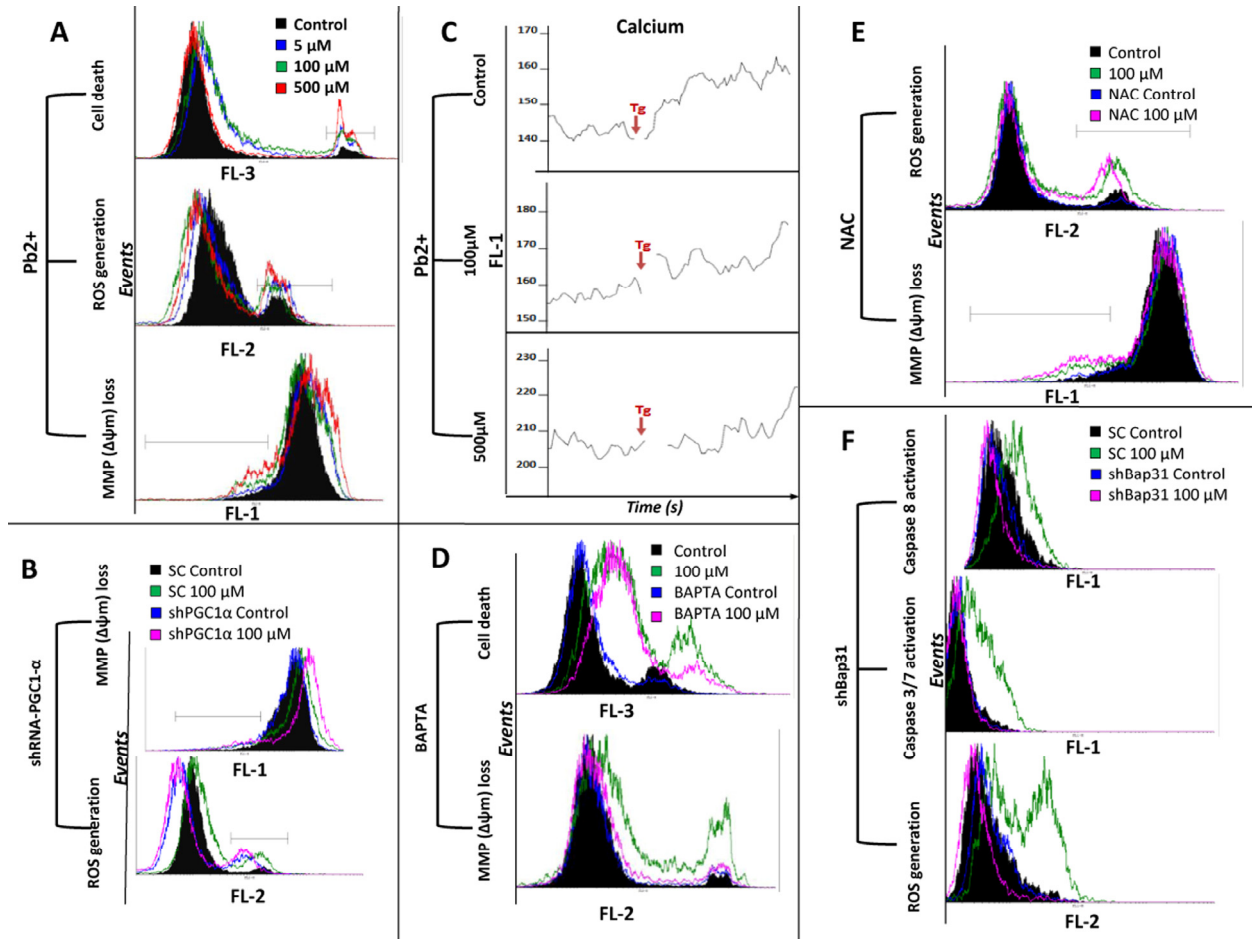

**Supplementary Figure 2-S2. Representative FACS analysis histograms of N27 cells exposed to lead.**(A) Analysis of mitochondrial depolarisation [MMP ( $\Delta\psi_m$ ) loss], mitochondrial ROS generation and cell death in N27 cells treated with lead for 48-hours. (B) Scramble and shRNA PGC1- $\alpha$  cells were treated with 100 $\mu$ M of lead for 48-hours and mitochondrial ROS generation and MMP ( $\Delta\psi_m$ ) loss were analysed by FACS. (C) N27 cells treated with lead for 48-hours were tested for calcium release using thapsigargin (Tg) and Rhod-2 staining followed by flow FACS analysis. (D) Pre-treatment of N27 cells with 5 $\mu$ M BAPTA-AM for 1 hour followed by a 48h lead-exposure and FACS analysis of MMP ( $\Delta\psi_m$ ) loss and cell death.(E) Pre-treatment of N27 cells with 1 mM N-acetylcysteine (NAC) for 1 hour followed by a 48h lead-exposure and later mitochondrial ROS and MMP ( $\Delta\psi_m$ ) FACS analysis.(F) N27 cells with stable downregulation of BAP31 (shBAP31) were used to investigate the involvement of BAP31 in lead-induced mitochondrial ROS and caspases 3/7 and 8 activation.

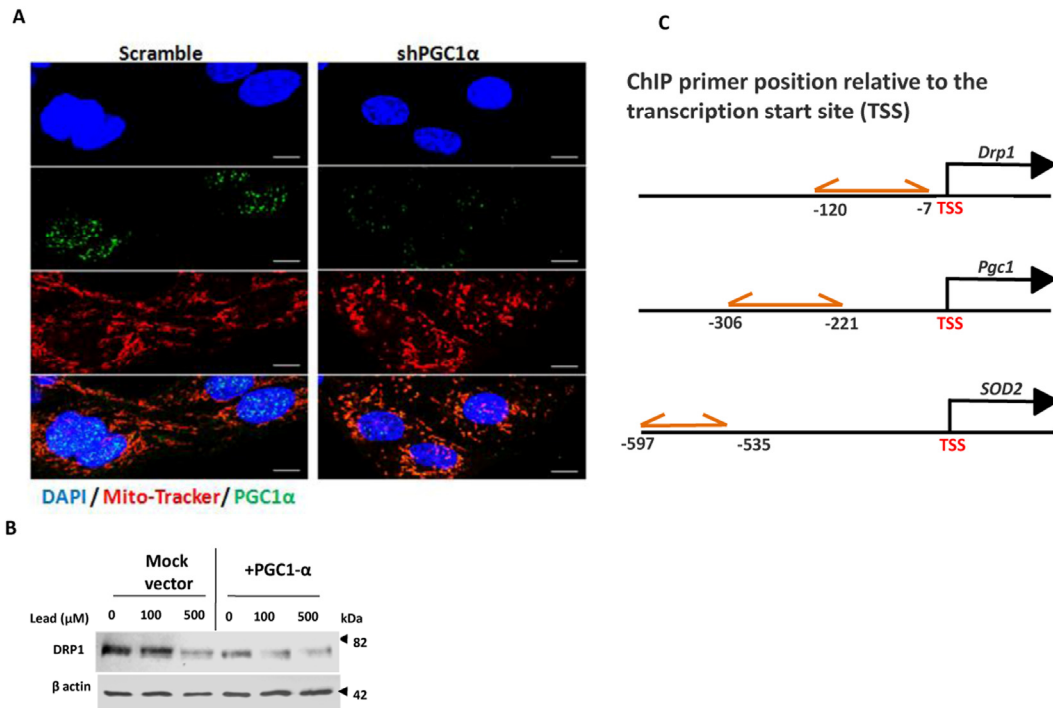

**Supplementary Figure 3-S3. Assessment of PGC-1 $\alpha$  and Drp-1 protein levels plus ChIP primer position relative to the transcription start site (TSS).** (A) Immunocytochemistry analysis of PGC-1 $\alpha$  protein level in PGC-1 $\alpha$  knock-down (sh-PGC1 $\alpha$ ) cells compared with the scramble cells. (B) Western blot analysis of transfected cells with PGC-1 $\alpha$  or mock vector treated with lead (100 $\mu$ M or 500 $\mu$ M). Beta-actin is used as a loading control. (C) ChIP primer position relative to the transcription start site (TSS).
